# Supplementary material for: Ultra-trace level detection of Cu2+ in an aqueous medium by novel Zn(ii)-dicarboxylato–pyridyl coordination polymers and cell imaging with HepG2 cells
Source: Royal Society of Chemistry journal article supplement (doi:10.1039/d1nj00917f), 2021-01-01
Supplement: d1nj00917f1.pdf [file d1nj00917f1.pdf]

### Supplementary Information

#### **Ultratrace level detection of Cu<sup>2+</sup> in aqueous medium by novel Zn(II)-dicarboxylato – pyridyl coordination polymers and cell imaging with HepG2 cells.**

Suprava Bhunia<sup>a</sup>, Basudeb Dutta<sup>a</sup>, Kunal Pal<sup>b</sup>, Angeera Chandra<sup>a</sup>, Kuladip Jana<sup>b</sup> and Chittaranjan Sinha<sup>\*a</sup>

| <b>Sl. No.</b> | <b>Contents</b>                                               | <b>Page No.</b> |
|----------------|---------------------------------------------------------------|-----------------|
| 1.             | IR spectroscopy of CP1 and CP1+Cu(II) ion.                    | 2               |
| 2.             | IR spectroscopy of CP2 and CP2+Cu(II) ion.                    | 2               |
| 3.             | Crystallographic data of CP1 (Table S2).                      | 3               |
| 4.             | Bond lengths and bond angles in CP1 (Table S3).               | 3,4             |
| 5.             | Crystallographic data of CP2 (Table S4).                      | 4,5             |
| 6.             | Bond lengths and bond angles in CP2 (Table S5).               | 5               |
| 7.             | List of H-bonding and spell field model of CP1.               | 6               |
| 8.             | List of $\pi\cdots\pi$ stacking and spell field model of CP2. | 6               |
| 9.             | Powder X-ray Diffraction analysis of CP1 and CP2.             | 7               |
| 10.            | Thermogravimetric analysis (TGA) of CP1 and CP2.              | 8               |
| 11.            | UV Visible spectrum of CP1 and CP1+Cu(II) ion in water.       | 9               |
| 12.            | UV Visible spectrum of CP2 and CP2+Cu(II) ion in water.       | 10              |
| 13.            | Intensity changes of CP1 and CP2 at different Cu salts.       | 11              |
| 14.            | pH plot of CP1 and CP2.                                       | 12              |
| 15.            | Stren-Volmer plot of CP1 and CP2.                             | 13              |
| 16.            | Life time plot of CP1 and CP2.                                | 14              |
| 17.            | Limit of detection (LOD) plot of CP1 and CP2.                 | 15              |
| 18.            | Interaction of Cu(II) with CP1 and CP2                        | 16              |
| 19.            | Comparison data for Cu <sup>2+</sup> ion sensor (Table S1).   | 17              |
| 20.            | Reference.                                                    | 18              |

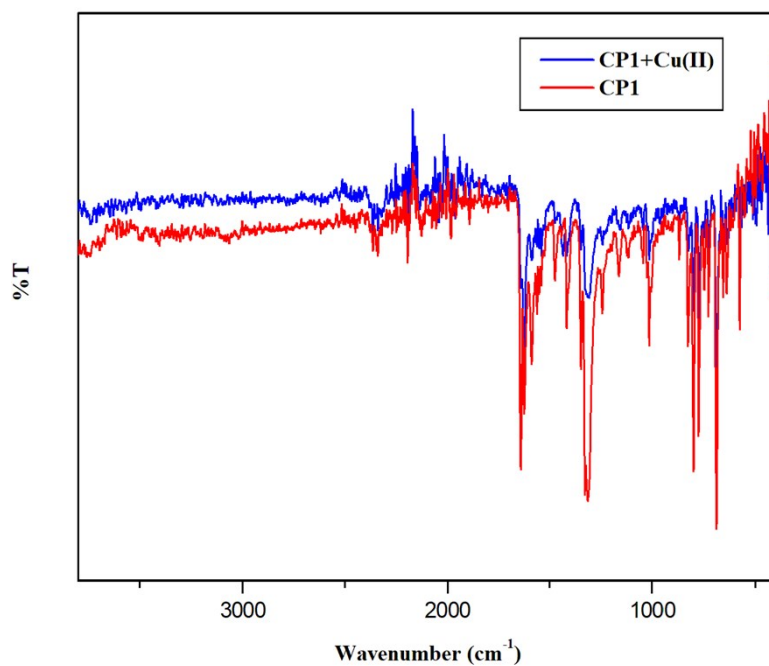

**Figure S1.** IR spectra of CP1 and CP1+Cu(II) ion.

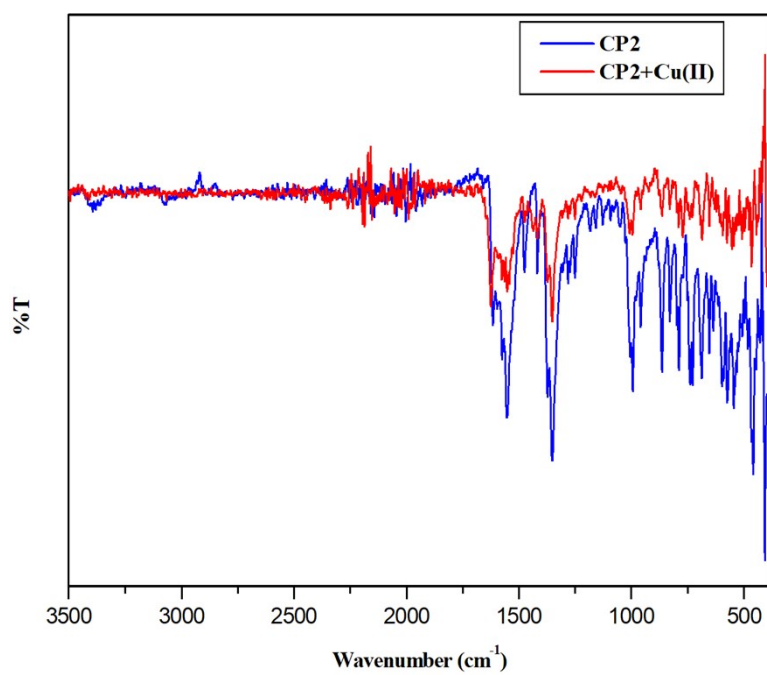

**Figure S2.** IR spectra of CP2 and CP2+Cu(II) ion.

**Table S1** Crystal data and refinement parameters for compound CP1.

|                                                                            |                                                                     |
|----------------------------------------------------------------------------|---------------------------------------------------------------------|
| Formula                                                                    | C <sub>19</sub> H <sub>12</sub> Cl N <sub>3</sub> O <sub>5</sub> Zn |
| fw                                                                         | 461.19                                                              |
| crystalsyst                                                                | triclinic                                                           |
| space group                                                                | <i>P</i> -1                                                         |
| <i>a</i> (Å)                                                               | 9.0876(7)                                                           |
| <i>b</i> (Å)                                                               | 10.0804(8)                                                          |
| <i>c</i> (Å)                                                               | 11.7778(9)                                                          |
| $\alpha$ (deg)                                                             | 66.626(2)                                                           |
| $\beta$ (deg)                                                              | 75.962(2)                                                           |
| $\gamma$ (deg)                                                             | 65.717(2)                                                           |
| <i>V</i> (Å <sup>3</sup> )                                                 | 898.68(12)                                                          |
| <i>Z</i>                                                                   | 2                                                                   |
| <i>D</i> <sub>calcd</sub> (g/cm <sup>3</sup> )                             | 1.704                                                               |
| $\mu$ (mm <sup>-1</sup> )                                                  | 1.515                                                               |
| $\lambda$ (Å)                                                              | 0.71073                                                             |
| data[ <i>I</i> > 2 $\sigma$ ( <i>I</i> )]/params                           | 3093/268                                                            |
| GOF on <i>F</i> <sup>2</sup>                                               | 1.343                                                               |
| final <i>R</i> indices[ <i>I</i> > 2 $\sigma$ ( <i>I</i> )] <sup>a,b</sup> | <i>R</i> 1 = 0.0270<br><i>wR</i> 2 = 0.0990                         |

$$^a R1 = \frac{\sum ||F_o| - |F_c||}{\sum |F_o|}, \quad ^b wR2 = \left[ \frac{\sum w(F_o^2 - F_c^2)^2}{\sum w(F_o^2)^2} \right]^{1/2}$$

**Table S2** Selected bond lengths and bond angles in CP1.

|                     |            |                      |            |
|---------------------|------------|----------------------|------------|
| Zn(1) - O(1)        | 1.9870(19) | N(1) - Zn(1) - O(4)b | 87.32(8)   |
| Zn(1) - O(3)        | 2.082(2)   | N(2) - Zn(1) - N(3)  | 75.55(8)   |
| Zn(1) - N(1)        | 2.154(2)   | N(2) - Zn(1) - O(4)b | 82.66(7)   |
| Zn(1) - N(2)        | 2.080(2)   | N(3) - Zn(1) - O(4)b | 86.46(8)   |
| Zn(1) - N(3)        | 2.166(2)   | Zn(1) - O(3) - C(1)  | 120.03(17) |
| Zn(1) - O(4)b       | 2.510(2)   | C(4) - O(4) - Zn(1)a | 122.45(18) |
| O(1) - Zn(1) - O(3) | 100.39(8)  | Zn(1) - N(1) - C(15) | 115.47(17) |
| O(1) - Zn(1) - N(1) | 110.65(8)  | Zn(1) - N(1) - C(19) | 125.85(16) |

|                      |           |                      |            |
|----------------------|-----------|----------------------|------------|
| O(1) - Zn(1) - N(2)  | 163.19(8) | Zn(1) - N(2) - C(10) | 119.84(16) |
| O(1) - Zn(1) - N(3)  | 95.85(8)  | Zn(1) - N(2) - C(14) | 118.93(16) |
| O(1) - Zn(1) - O(4)b | 82.41(7)  | Zn(1) - N(3) - C(5)  | 124.97(16) |
| O(3) - Zn(1) - N(1)  | 95.18(8)  | Zn(1) - N(3) - C(9)  | 115.85(17) |
| O(3) - Zn(1) - N(2)  | 94.03(7)  | N(1) - Zn(1) - N(3)  | 151.69(7)  |
| O(3) - Zn(1) - N(3)  | 89.46(8)  | N(1) - Zn(1) - N(2)  | 76.27(8)   |
| O(3) - Zn(1) - O(4)b | 175.29(8) |                      |            |

a = x, -1+y, z                      b = x, 1+y, z

**Table S3** Crystal data and refinement parameters for compound CP2.

|                                                                            |                                                                      |
|----------------------------------------------------------------------------|----------------------------------------------------------------------|
| Formula                                                                    | C <sub>21</sub> H <sub>15</sub> Cl N <sub>3</sub> O <sub>5</sub> Zn, |
| fw                                                                         | 490.20                                                               |
| crystalsyst                                                                | Triclinic                                                            |
| space group                                                                | <i>P</i> -1                                                          |
| <i>a</i> (Å)                                                               | 8.697(5)                                                             |
| <i>b</i> (Å)                                                               | 10.798(6)                                                            |
| <i>c</i> (Å)                                                               | 13.165(7)                                                            |
| $\alpha$ (deg)                                                             | 100.543(14)                                                          |
| $\beta$ (deg)                                                              | 105.004(14)                                                          |
| $\gamma$ (deg)                                                             | 113.587(14)                                                          |
| <i>V</i> (Å <sup>3</sup> )                                                 | 1035.5(10)                                                           |
| <i>Z</i>                                                                   | 2                                                                    |
| <i>D</i> <sub>calcd</sub> (g/cm <sup>3</sup> )                             | 1.572                                                                |
| $\mu$ (mm <sup>-1</sup> )                                                  | 1.354                                                                |
| $\lambda$ (Å)                                                              | 0.71073                                                              |
| data[ <i>I</i> > 2 $\sigma$ ( <i>I</i> )]/params                           | 3529/286                                                             |
| GOF on <i>F</i> <sup>2</sup>                                               | 1.073                                                                |
| final <i>R</i> indices[ <i>I</i> > 2 $\sigma$ ( <i>I</i> )] <sup>a,b</sup> | <i>R</i> 1 = 0.0766<br><i>wR</i> 2 = 0.2159                          |

**Table S4** Selected bond lengths and bond angles in CP2.

|                     |            |                      |            |
|---------------------|------------|----------------------|------------|
| Zn(1) - O(1)        | 1.961(4)   | N(1) - Zn(1) - N(2)  | 74.7(2)    |
| Zn(1) - O(3)        | 1.951(5)   | N(1) - Zn(1) - N(3)  | 150.69(18) |
| Zn(1) - N(1)        | 2.211(6)   | N(2) - Zn(1) - N(3)  | 76.2(2)    |
| Zn(1) - N(2)        | 2.092(5)   | Zn(1) - O(1) - C(19) | 119.5(4)   |
| Zn(1) - N(3)        | 2.174(7)   | Zn(1) - O(3) - C(3)  | 115.4(4)   |
| O(1) - Zn(1) - O(3) | 98.53(18)  | Zn(1) - N(1) - C(14) | 116.1(4)   |
| O(1) - Zn(1) - N(1) | 92.3(2)    | Zn(1) - N(1) - C(18) | 125.6(4)   |
| O(1) - Zn(1) - N(2) | 132.83(19) | Zn(1) - N(2) - C(9)  | 117.8(4)   |
| O(1) - Zn(1) - N(3) | 104.9(2)   | Zn(1) - N(2) - C(13) | 119.9(4)   |
| O(3) - Zn(1) - N(1) | 105.0(2)   | Zn(1) - N(3) - C(4)  | 126.3(5)   |
| O(3) - Zn(1) - N(2) | 128.6(2)   | Zn(1) - N(3) - C(8)  | 115.4(5)   |
| O(3) - Zn(1) - N(3) | 95.8(2)    | N(1) - Zn(1) - N(3)  | 150.69(18) |

a = x,-1+y,z

b = x,1+y,z

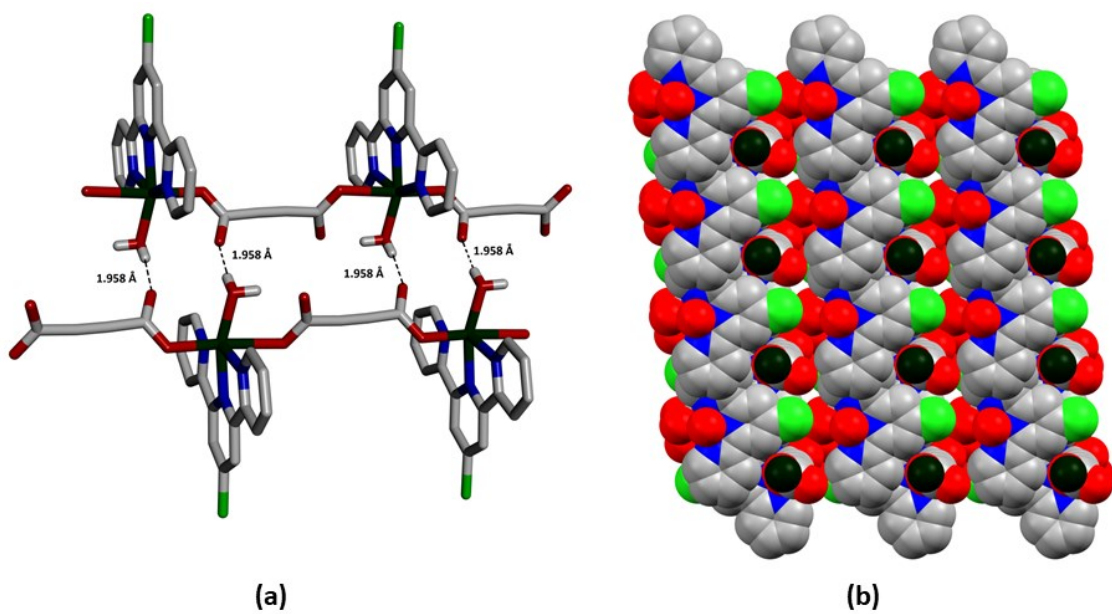

**Figure S3.** (a) H-bonding interaction between water and  $adc^{2-}$  ion in CP1. (b) spell field model of CP1.

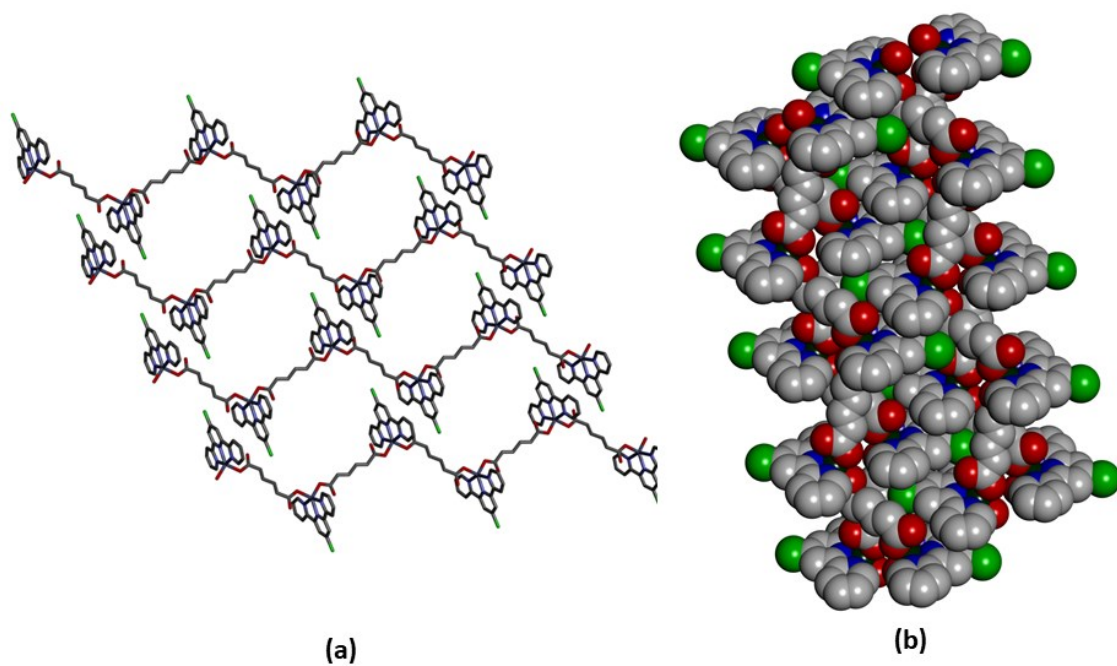

**Figure S4.** (a) Supramolecular aggregate of 1D coordination polymer. (b) Spell field model of CP2.

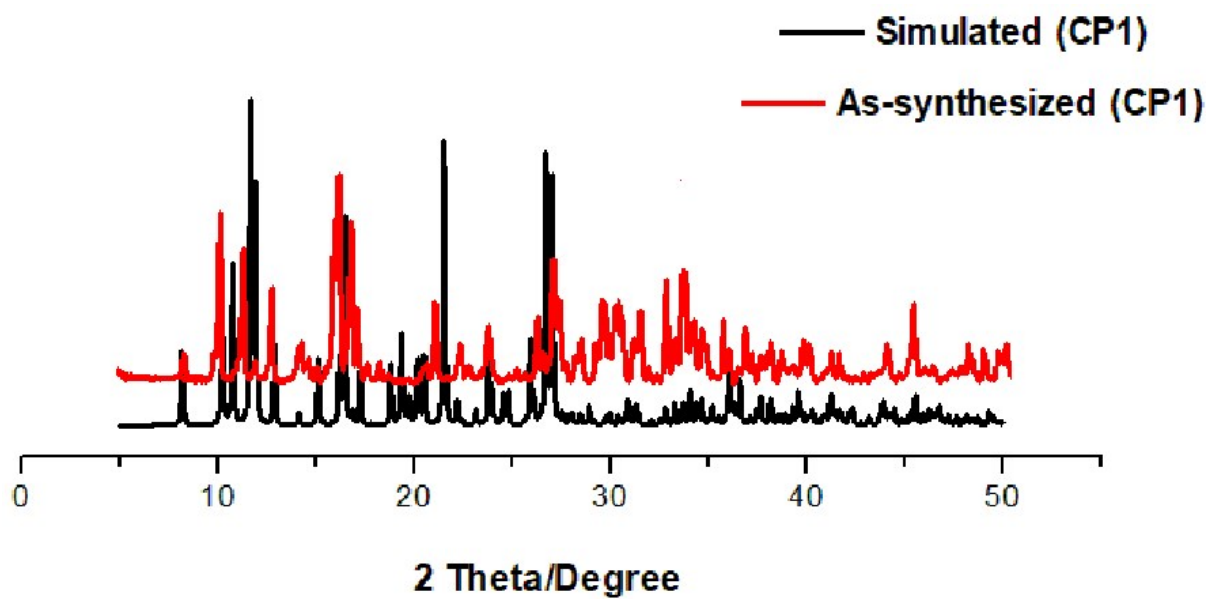

Figure S5. Powder X-ray Diffraction analysis of CP1.

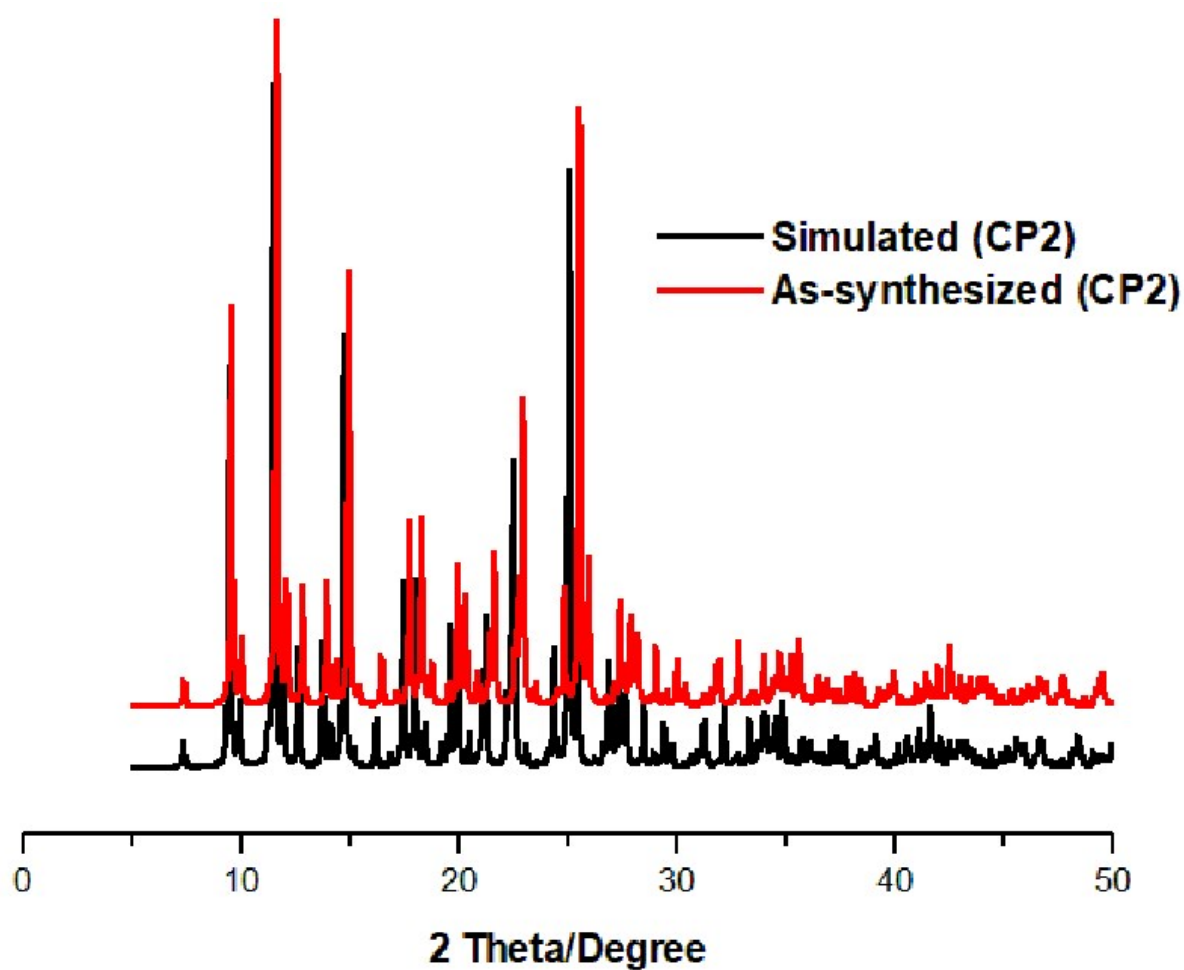

Figure S6. Powder X-ray Diffraction analysis of CP2.

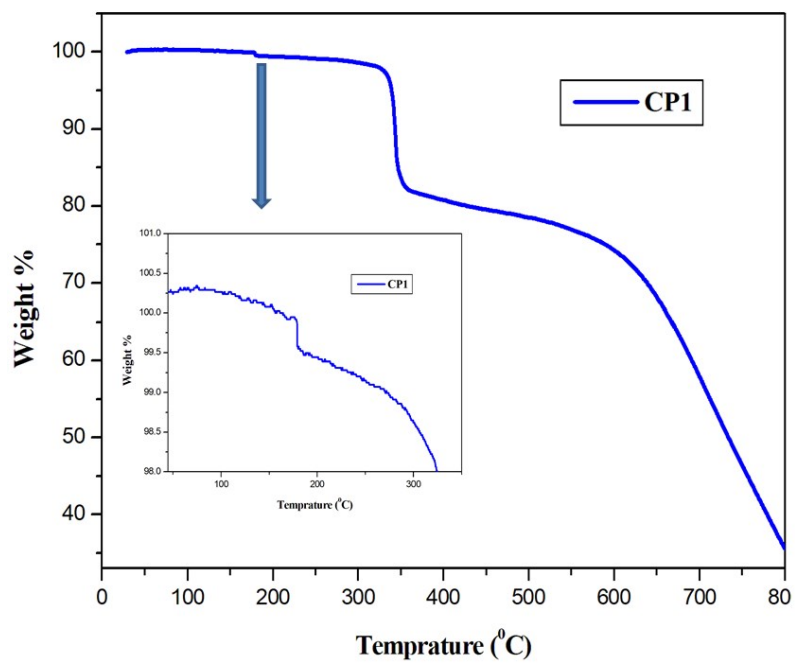

**Figure S7.** Thermogravimetric analysis (TGA) of CP1.

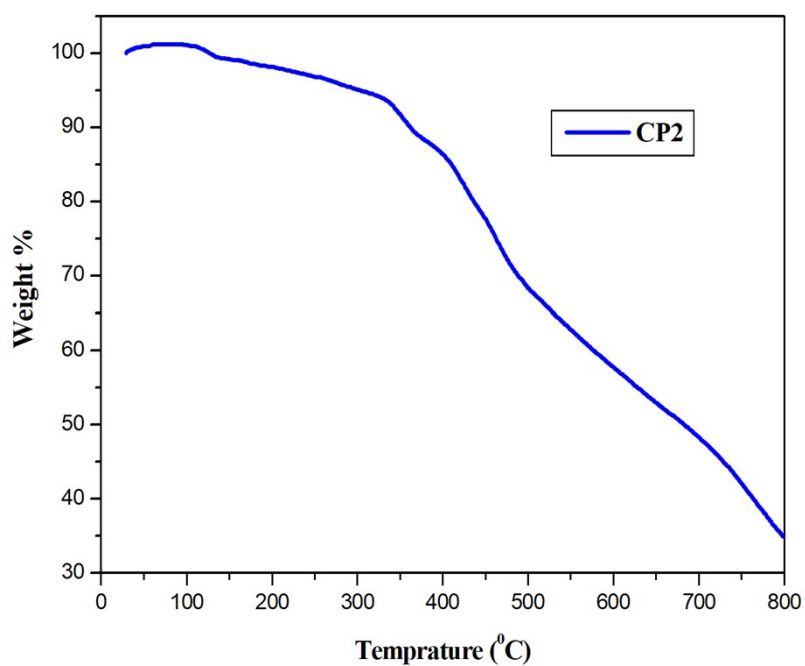

**Figure S8.** Thermogravimetric analysis (TGA) of CP2.



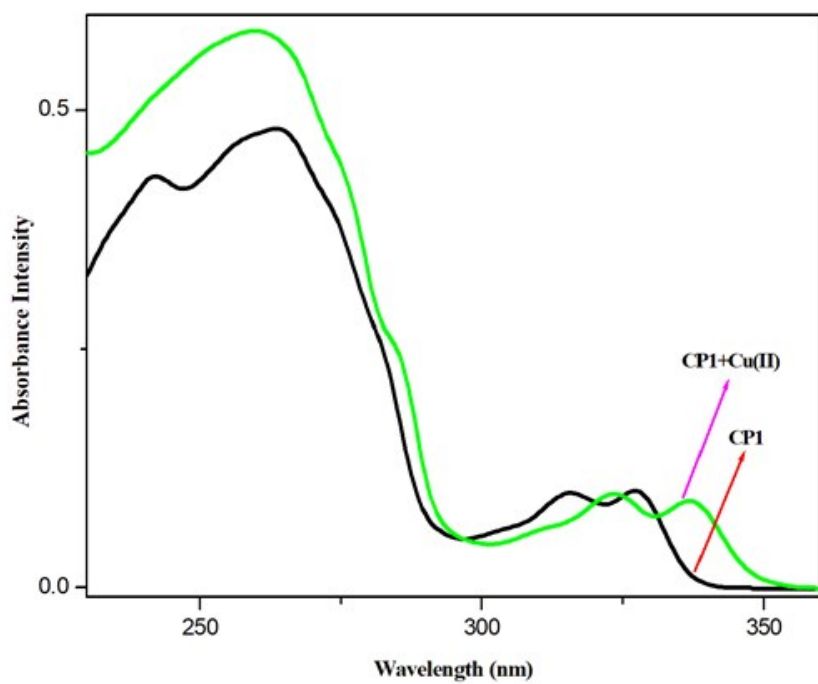

(a)

Figure S9. UV Visible spectrum of CP1 and CP1+Cu(II) in aqueous medium.

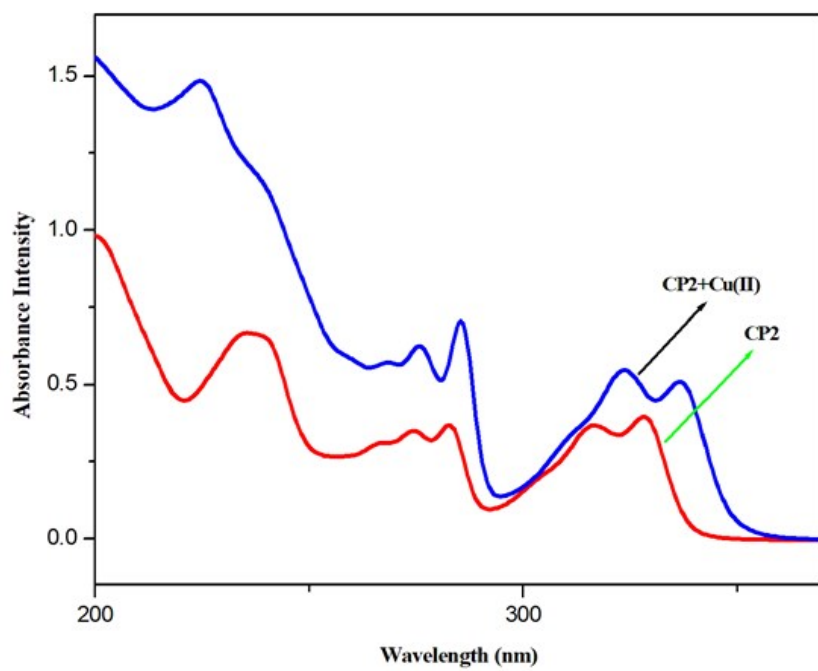

(b)

Figure S10. UV Visible spectrum of CP2 and CP2+Cu(II) in aqueous medium.

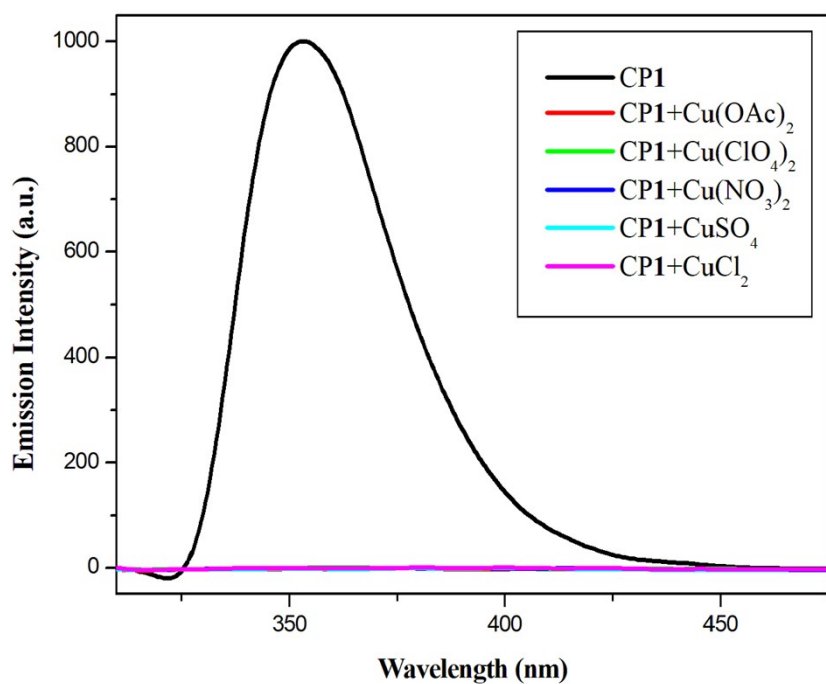

**Figure S11.** Emission Intensity of CP1 in presence of different Cu salts.

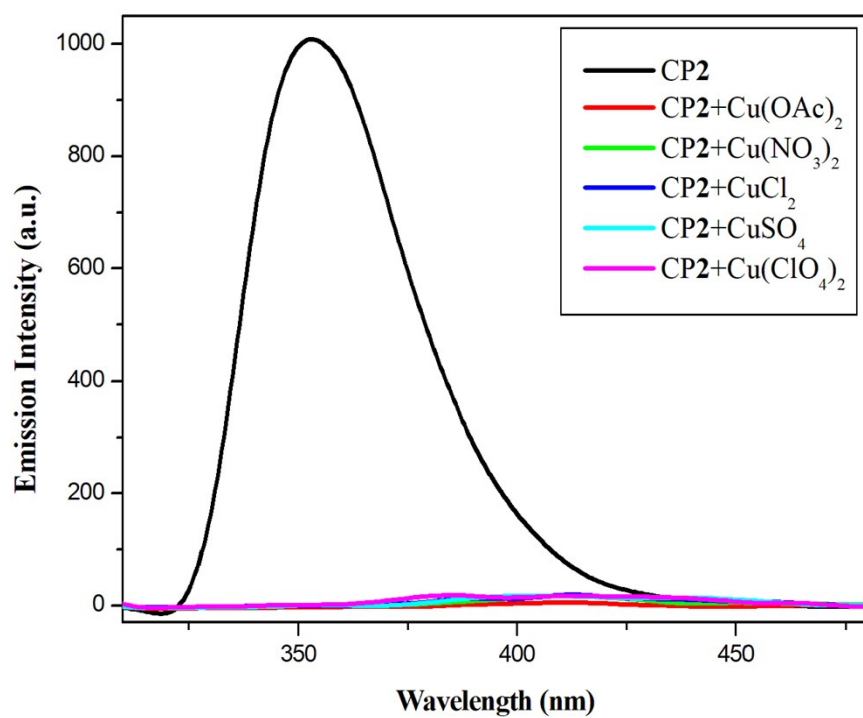

**Figure S12.** Emission Intensity of CP2 in presence of different Cu salts.

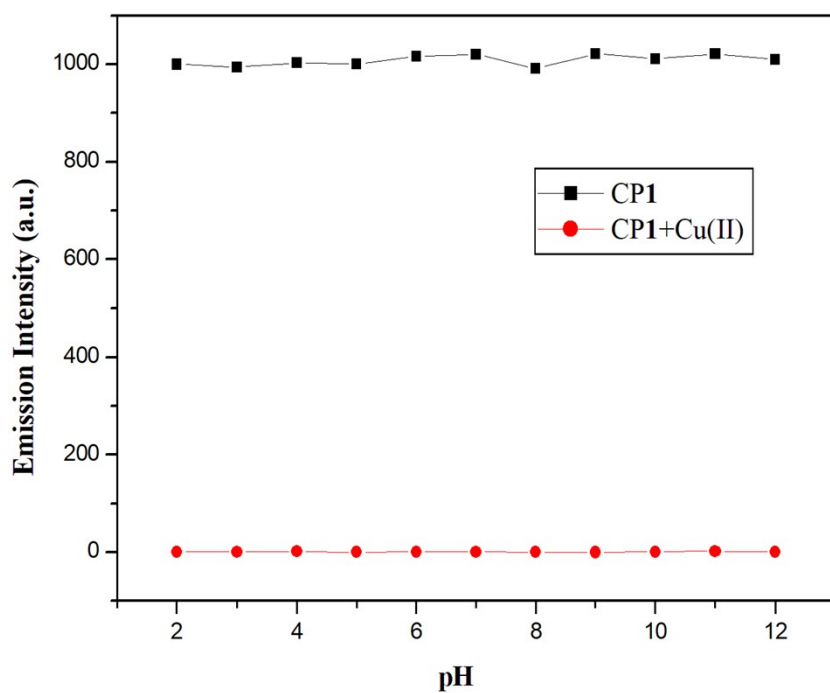

**Figure S13.** Emission Intensity of CP1 and CP1 in presence of Cu(II) ion at different pH.

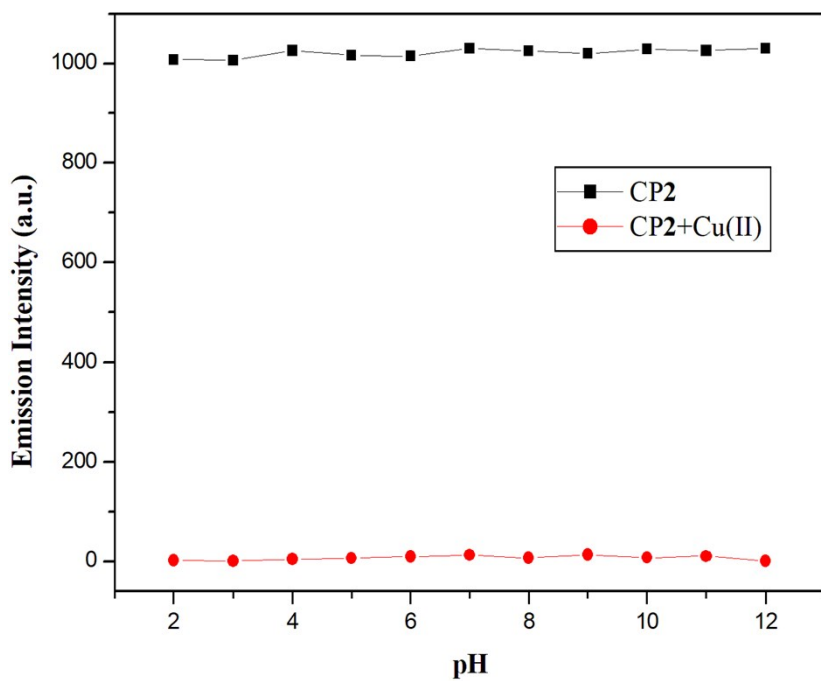

**Figure S14.** Emission Intensity of CP1 and CP1 in presence of Cu(II) ion at different pH.

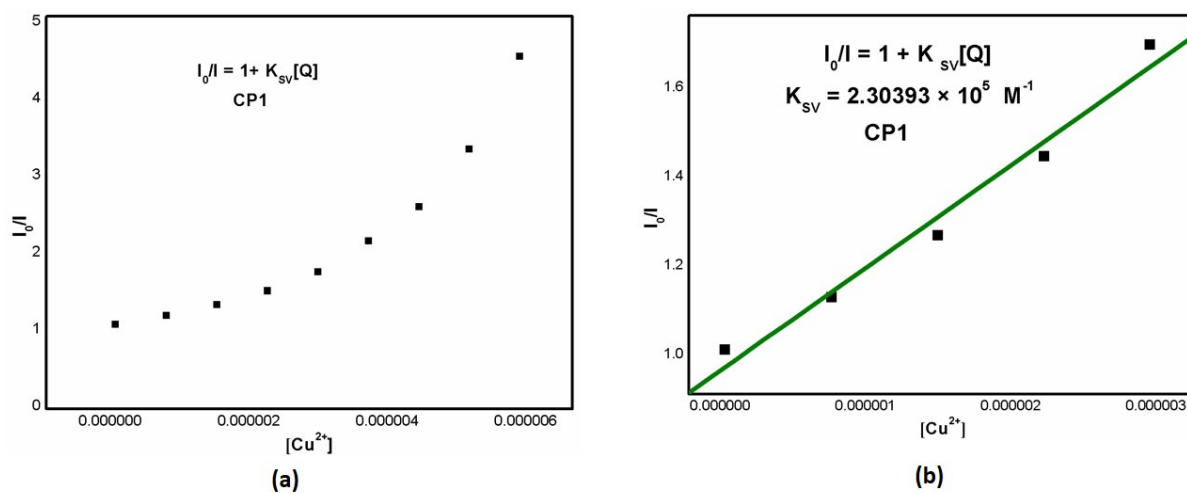

**Figure S15. (a)** Stern-Volmer plot of CP1. **(b)** Stern-Volmer plot of CP1 at lower range of quencher  $[Cu^{2+}]$  (in M) concentration.

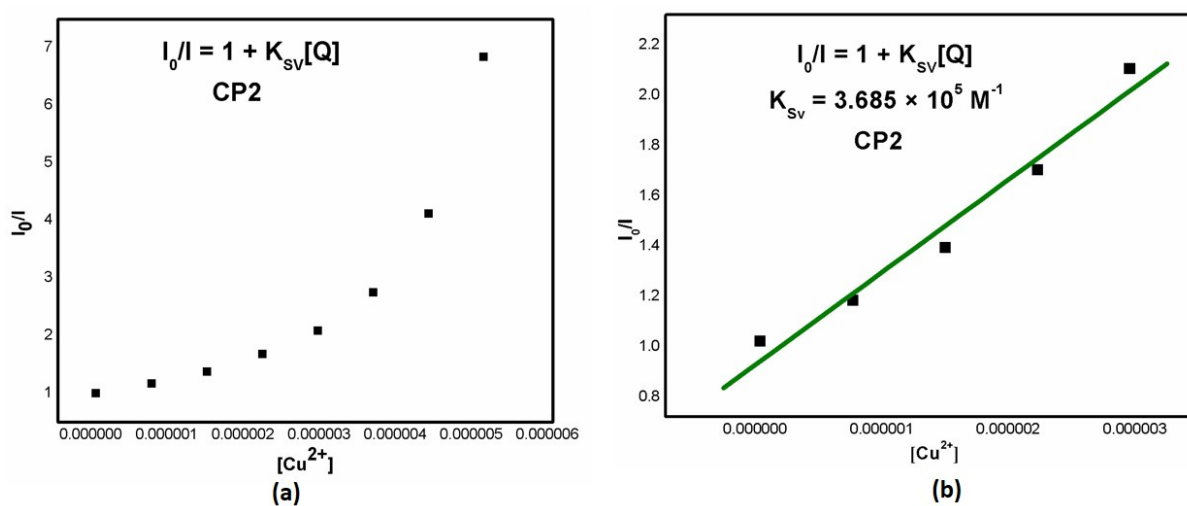

**Figure S16. (a)** Stern-Volmer plot of CP2. **(b)** Stern-Volmer plot of CP2 at lower range of quencher  $[Cu^{2+}]$  (in M) concentration.

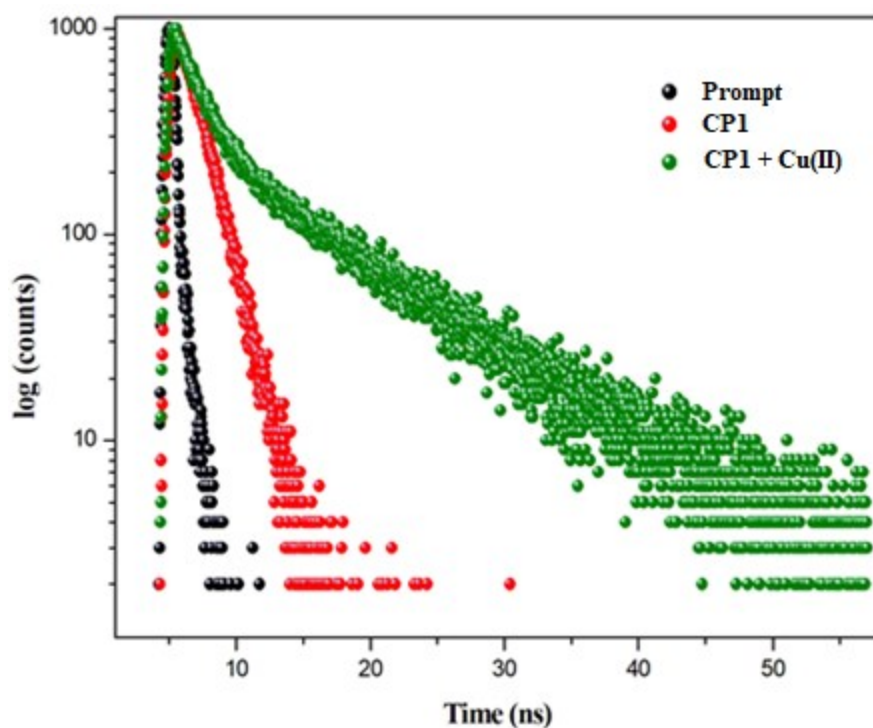

**Figure 17** Excited state decay profile of prompt, CP1 and  $\text{Cu}^{2+}$  ion with CP1 in aqueous medium.

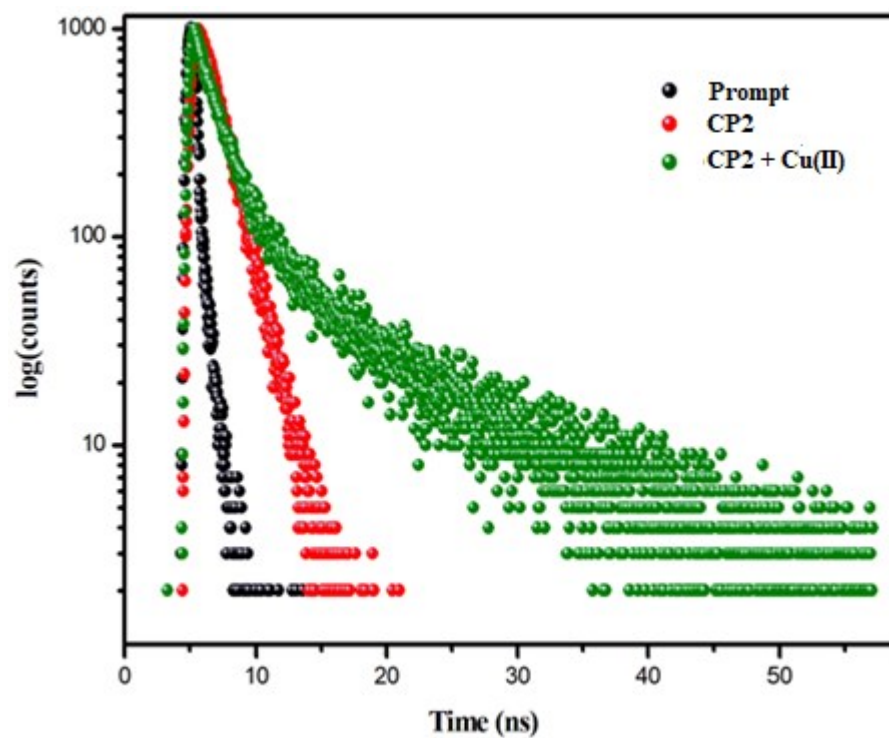

**Figure S18** Excited state decay profile of prompt, CP1 and  $\text{Cu}^{2+}$  ion with CP1 in aqueous medium.

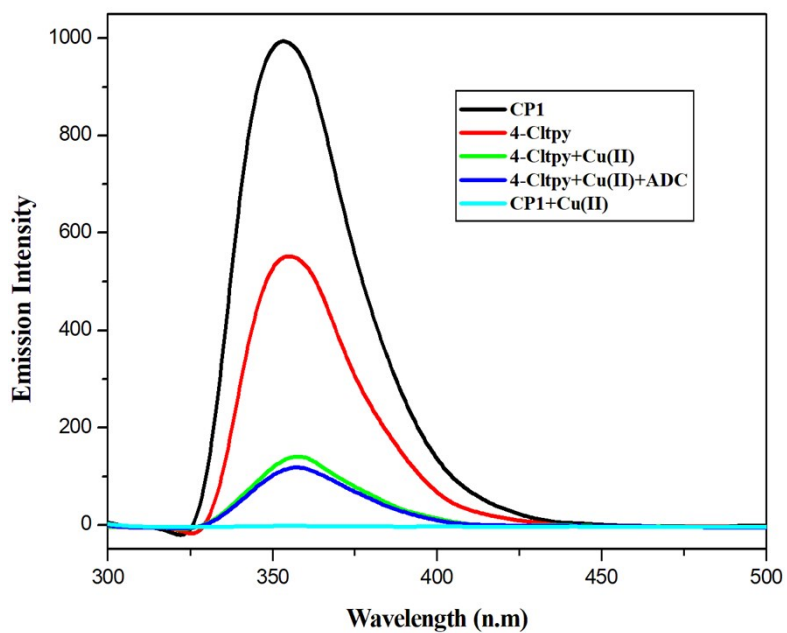

**Figure S19** Emission intensity of CP1 , constitute materials of CP1 and their intensity change in presence of Cu(II) ion.

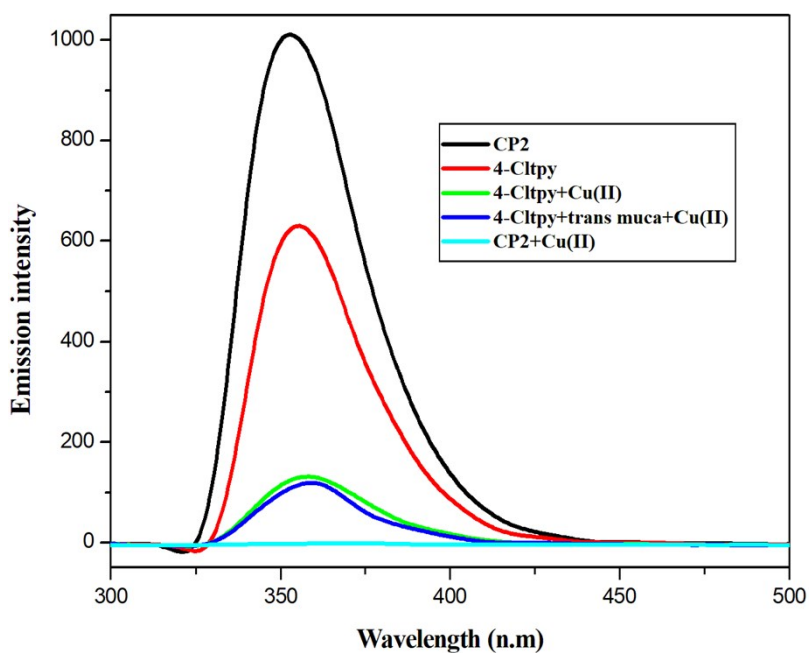

**Figure S20** Emission intensity of CP2 , constitute materials of CP2 and their intensity change in presence of Cu(II) ion.

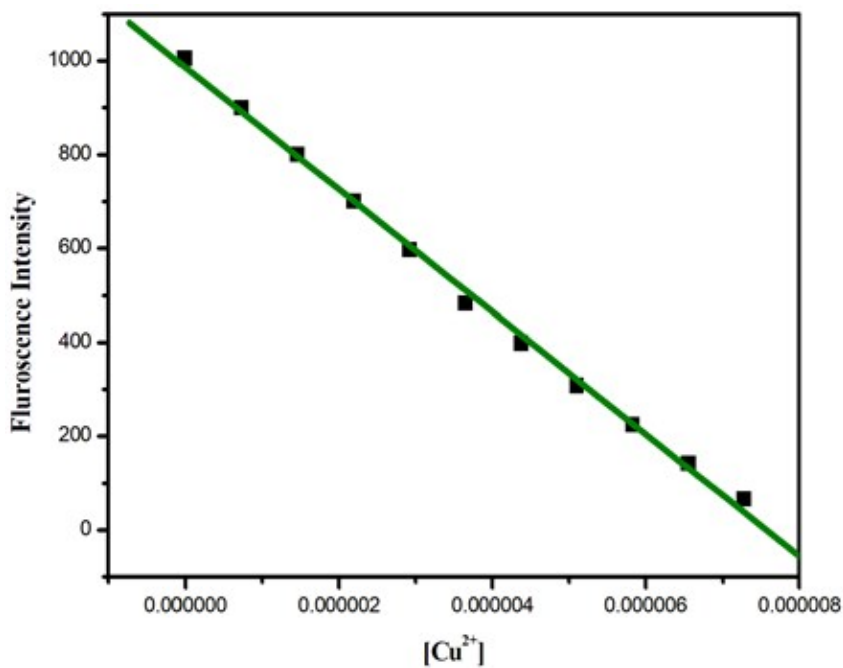

**Figure S21** The linear dynamic response of CP1 for Cu<sup>2+</sup> ion and the determination of the limit of detection(LOD) of Cu<sup>2+</sup> ion.

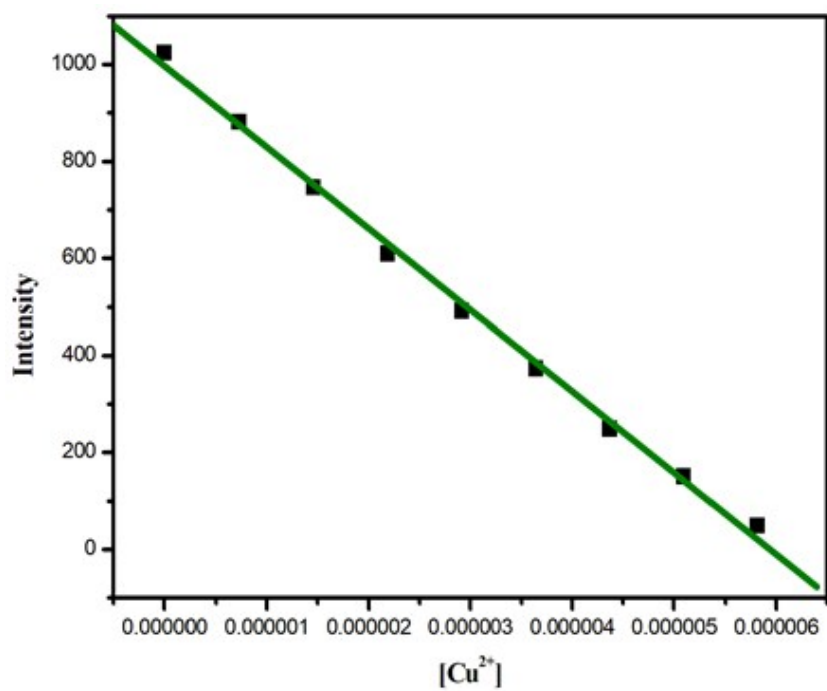

**Figure S22** The linear dynamic response of CP2 for Cu<sup>2+</sup> ion and the determination of the limit of detection (LOD) of Cu<sup>2+</sup> ion.

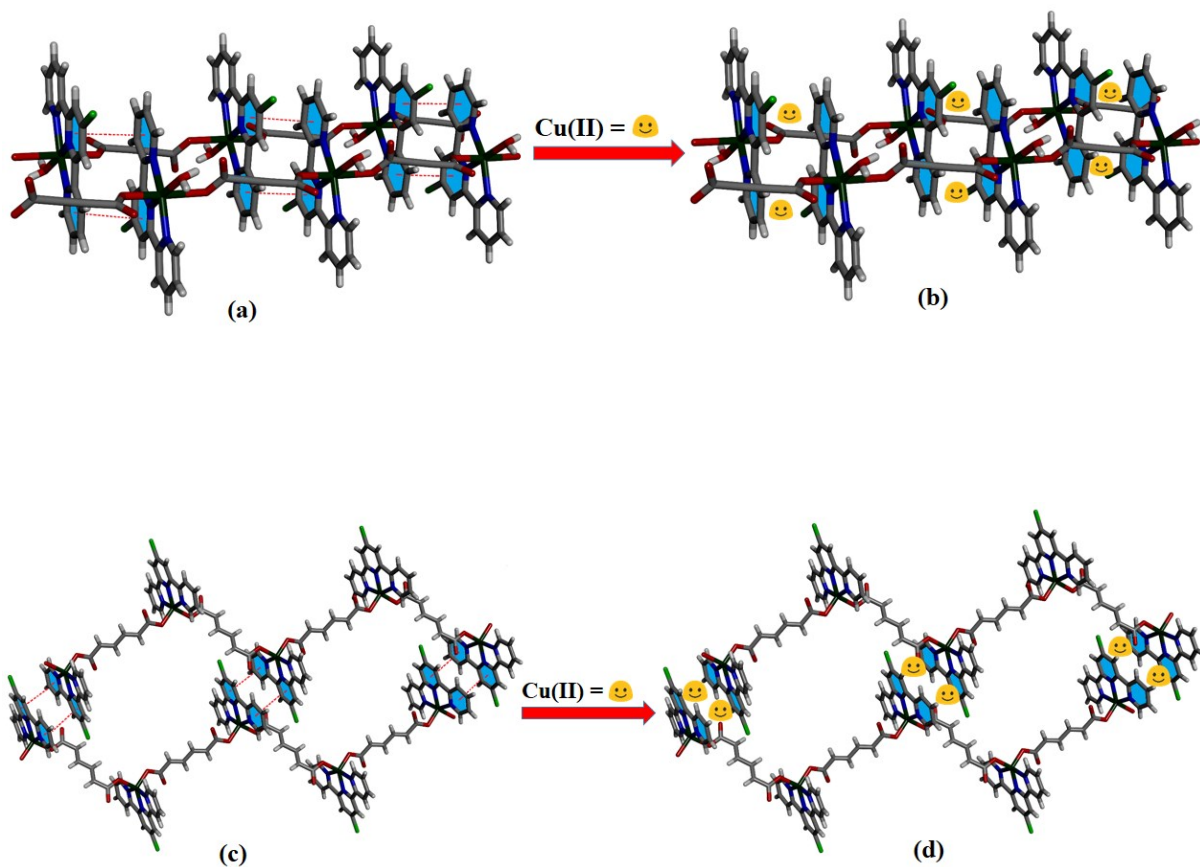

**Figure S23.** (a)  $\pi \cdots \pi$  interaction between CP1 moiety, (b) interaction between Cu(II) and CP1, (c)  $\pi \cdots \pi$  interaction between CP2 moiety, (d) interaction between Cu(II) and CP2.



**Table S5** Comparison data for Cu<sup>2+</sup> ion sensor.

| Sl. No. | Ligand                                                                                                      | Selectivity (LOD)                 | Solvent                      | Live Cell Imaging | Reference        |
|---------|-------------------------------------------------------------------------------------------------------------|-----------------------------------|------------------------------|-------------------|------------------|
| 1.      | 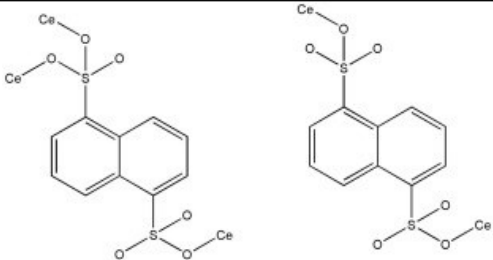                           | 3.0 μM.                           | Water                        | No                | 1.               |
| 2.      | SSA/AMP-Tb, 5-sulfosalicylic acid (SSA), adenosine monophosphate (AMP) and terbium ion (Tb <sup>3+</sup> ), | 0.3 μM                            | HEPES buffer (0.1 M, pH 7.4) | No                | 2.               |
| 3.      |                          | 0.01 μM.                          | MeCN                         | No                | 3.               |
| 4.      |                          | 0.45 μM.                          | MeOH                         | No                | 4.               |
| 5.      | CP1 and CP2                                                                                                 | 0.14 μM and 0.06 μM respectively. | Water                        | Yes               | <b>This Work</b> |

## Reference:

1. S. Geranmayeh, M. Mohammadnejad and S. Mohammadi, *Ultrason. Sonochem.*, 2018, **40**, 453-459.
2. P. Huang, F. Wu and L.Mao, *Anal. Chem.* 2015, **87**, 6834-6841.
3. H. She, F. Song, J. Xu, X. Xiong, G. Chen,; J. Fan, S. Sun and X. Peng, *Chem. Asian J.* 2013, **8**, 2762-2767.
4. G. V. Vaidyanathan and U. B. Nair, *Dalton Trans.* 2012, **41**, 5769-5773.
